# Supplementary material for: Optimal utilization of fluoroethylene carbonate in potassium ion batteries
Source: Royal Society of Chemistry journal article supplement (doi:10.1039/d0cc06467j), 2020-11-25
Supplement: d0cc06467j1.pdf [file d0cc06467j1.pdf]

## Supporting Information

### **Optimal utilization of fluoroethylene carbonate in potassium ion batteries**

Chaofei Zhang<sup>‡a</sup>, Juan Chen<sup>‡a</sup>, Xing Yin<sup>a</sup>, Yidan Sun<sup>a</sup>, Wei Yang<sup>b</sup>, Fengjiao Yu<sup>a</sup>,  
Xiaojing Liu<sup>a\*</sup>, Lijun Fu<sup>a</sup>, Yuhui Chen<sup>a</sup> and Yuping Wu<sup>a</sup>

<sup>a</sup> *State Key Laboratory of Materials-oriented Chemical Engineering, College of Chemical Engineering, School of Energy Science and Engineering, Nanjing Tech University, Nanjing, Jiangsu, 211816, China*

<sup>b</sup> *Tianmu Lake Institute of Advanced Energy Storage Technologies, Chuangzhi Park, Zhongguancun, 87 Shangshang Road, Liyang, Jiangsu, 213300, China*

<sup>‡</sup>*These authors contributed equally to this work.*

#### **Experimental section**

##### **Materials and method:**

KClO<sub>4</sub> (99% purity), and K metal (99.5%) were purchased from Sigma-Aldrich. Fluoroethylene carbonate (FEC) and propylene carbonate (PC) were purchased from DuoDuoChem. The glass fiber separator (GF/F, 420 μm thickness) was purchased from Whatman.

The based organic electrolyte solutions were prepared by dissolving the KClO<sub>4</sub> into PC with a 0.1 M concentration in an Ar-filled glove box. 5 % FEC additives (V/V) were added in this based organic electrolyte for forming SEI. For comparison, electrochemical tests were further conducted in 5% FEC-based and FEC-free electrolyte.

Besides, we also adopted the other method to treat the potassium foil. The potassium foil was dipped into pure FEC for 2 minutes, and then was rinsed by PC for three times to remove the redundant FEC prior to use. The cycling performance for this 2-min sample was also studied.

**Electrochemical measurements:**

Electrochemical tests were carried out using 2032 type coin cells. The cell consists of two potassium metal electrodes separated by a glass fiber membrane. 100  $\mu\text{L}$  electrolyte was added into coin cells. Galvanostatic cycling was performed in a LANHE battery testing system at a current density of  $0.1 \text{ mA cm}^{-2}$ .

**EIS measurements and DRT analysis**

Electrochemical impedance spectroscopy (EIS) was performed on the potentiostat (VMP3, Biologic). The potentiostatic EIS of the potassium symmetric cell was measured after certain cycles. To be specific, the impedance was tested in the frequency range from 100kHz to 0.01Hz with an amplitude of 10 mV. In addition, six sample points were selected per decade frequency, each of which was repeated twice for average.

In the case of the DRT calculation, we adopted the open matlab code shared online by prof. Francesco Ciucci<sup>1,2</sup>. It is based on the Tikhonov regularization, and we took 0.005 as the regularization parameter in our calculations. Moreover, the range of DRT fit was based on the frequency range from 100 kHz to 0.01Hz after the Kramers-Kronig validity test.

**Characterizations:**

The SEI composition was confirmed by X-ray photoelectron spectroscopy (PHI5000 VersaprobeIII XPS, ULVAC-PHI.INC). The surface topography was characterized by scanning electron microscope (Regulus 8100). ICP-MS was performed on Thermo XSeries 2. TOF-SIMS 5-100 (ION-ToF GmbH, Germany) was employed to analyze depth profiling. The sample was transferred under inert gas. A  $\text{Bi}_1^+$  beam was used for depth profiling analysis and the typical sputtering area was  $200 \mu\text{m} \times 200 \mu\text{m}$ . A  $\text{Cs}^+$  ion beam was used for the sputtering of the immersed K foil.

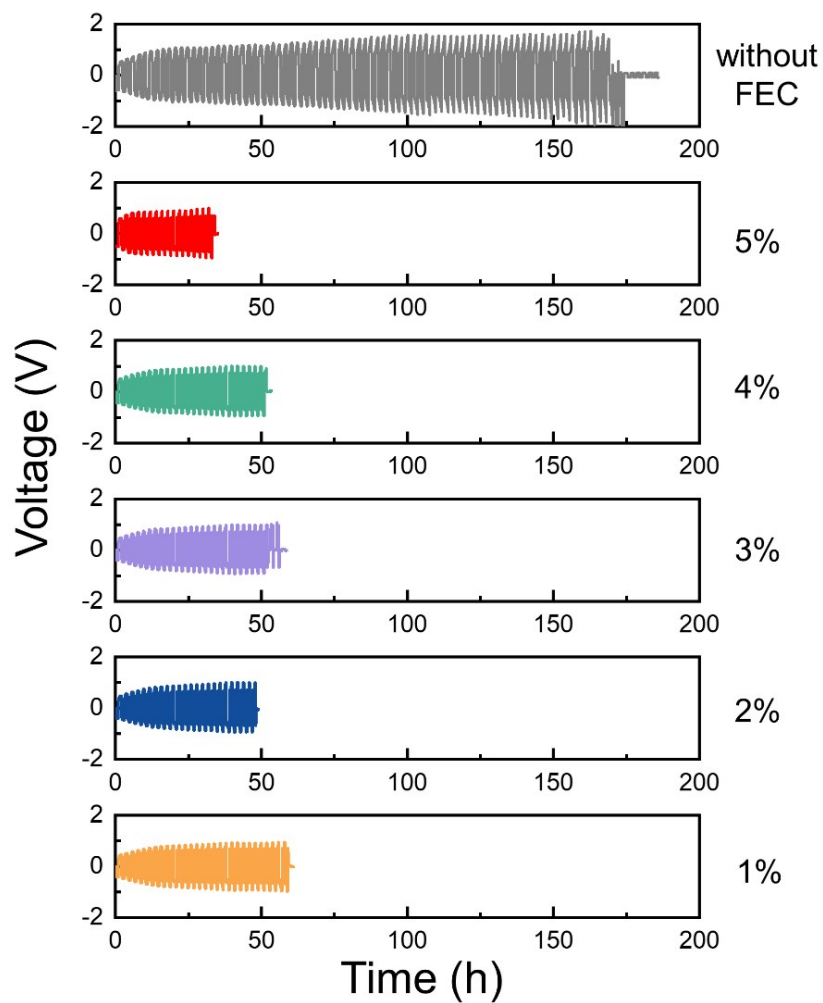

**Figure S1** Galvanostatic cycling performance of K-K symmetric cells in electrolyte with different FEC concentrations.

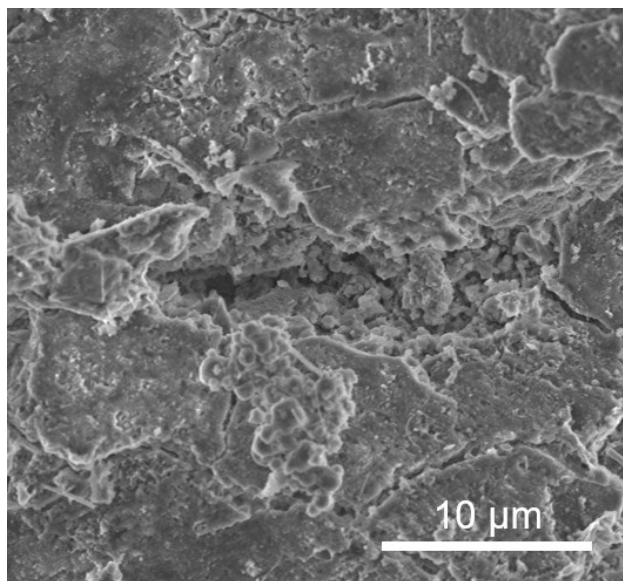

**Figure S2** SEM image of the surface of K metal anode after cycling 174 hours in the KClO<sub>4</sub> electrolyte without FEC.

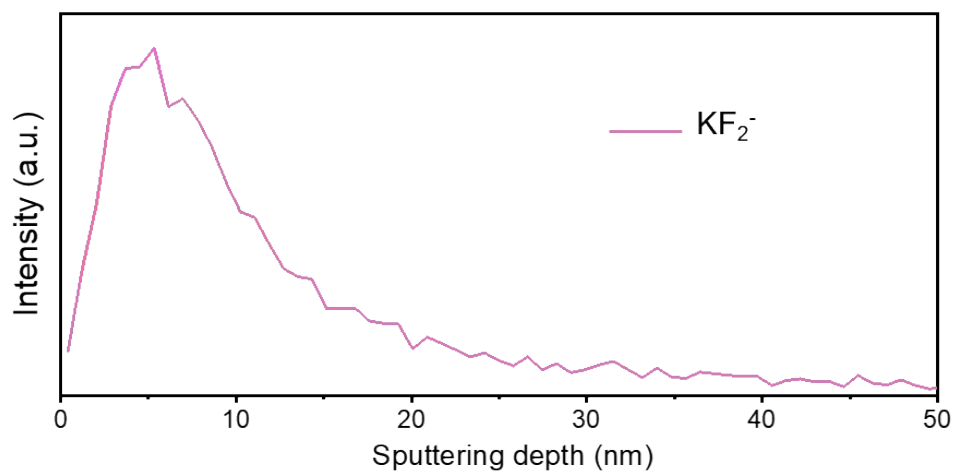

**Figure S3** TOF-SIMS depth profile of  $\text{KF}_2^-$  collected on K metal anode after 2min-immersion. (The thickness of the SEI section containing KF component is about 20 nm.)

| electrolyte                               | cycling performance | reference        |
|-------------------------------------------|---------------------|------------------|
| <i>half-cell</i>                          |                     |                  |
| 0.05 M KClO <sub>4</sub> PC               | 200 cycles          | 3                |
| KClO <sub>4</sub> PC containing 10% FEC   | 100 cycles          | 4                |
| <i>symmetric cell</i>                     |                     |                  |
| KPF <sub>6</sub> ECDEC+5% FEC             | 97 h                | 5, 6             |
| KPF <sub>6</sub> ECDEC                    | 125 h               |                  |
| KFSI ECDEC+5% FEC                         | 180 h               |                  |
| KFSI ECDEC                                | 208 h               |                  |
| 1 M KPF <sub>6</sub> PC                   | 200 h               | 7                |
| ECDEC                                     | 220 h               | 8                |
| 2 M KFSI TEP                              | 750 h               | 9                |
| KPF <sub>6</sub> ECDEC (K-ACM electrodes) | 230 h               | 10               |
| 0.1 M KClO <sub>4</sub> PC                | 1200 h              | <i>this work</i> |

**Table S1** Comparison of cycling performance with various electrolytes previously reported for PIBs.

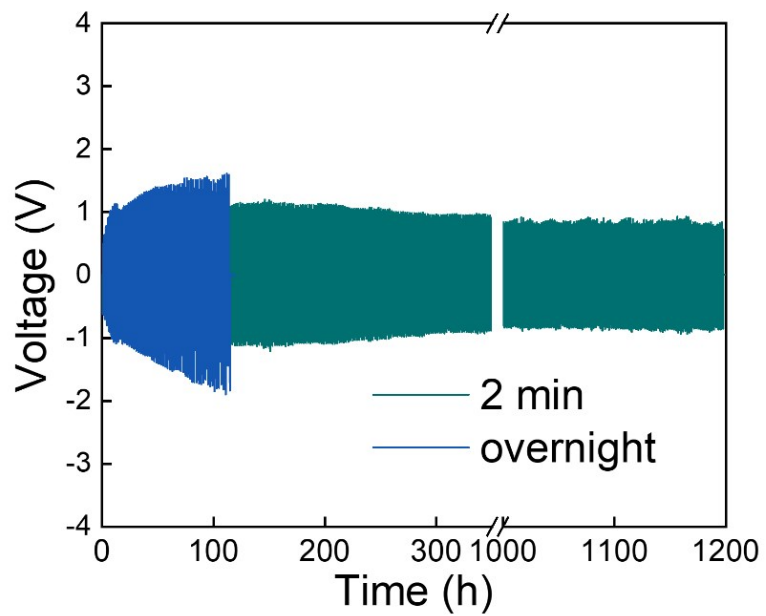

**Figure S4** Cycling performance of K-K symmetric cells with immersing the K foil into the pure FEC for different time.

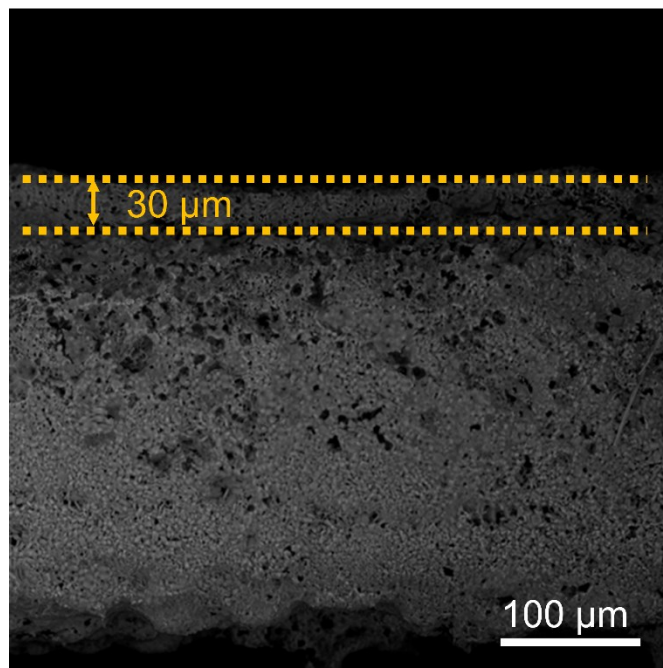

**Figure S5** Cross-section SEM image of K metal anode after cycling with a 2 min-immersing pretreatment.



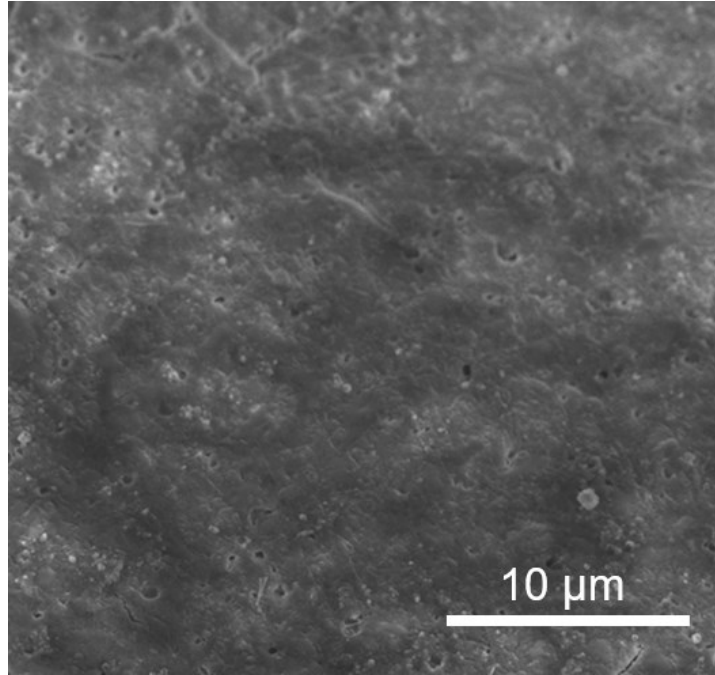

**Figure S6** SEM images of the surface of K metal anode treated with FEC for 2 min after cycling 174 hours.

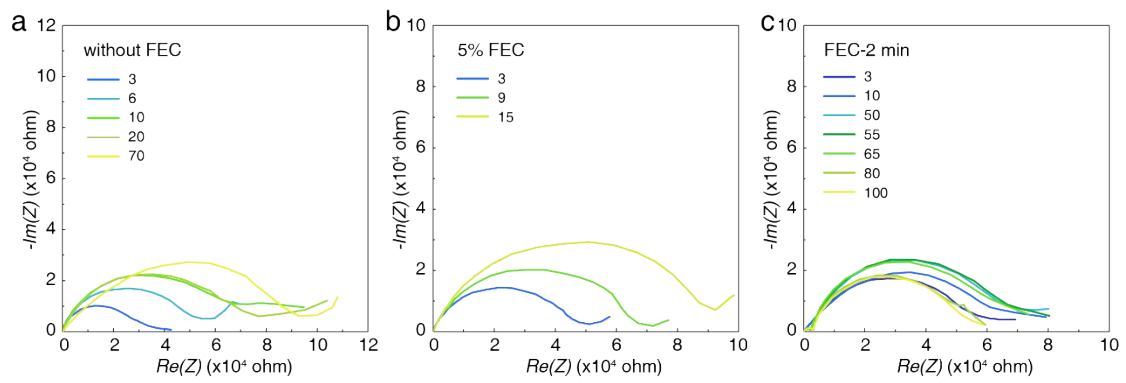

**Figure S7** *In-situ* EIS results of the K-K symmetric cell with 0.1 M  $\text{KClO}_4$ -PC electrolyte after various cycles: (a) without FEC, (b) electrolyte with 5% FEC, and (c) K metal anode treated with FEC for 2 min.

## References

- (1) T. Wang, M. Saccoccio, C. Chen, F. Ciucci, *Electrochimica Acta*, 2015, **184**, 483–499.
- (2) DRT tools and the manual, <https://sites.google.com/site/drttools/>
- (3) J. Liao, Q. Hu, Y. Yu, H. Wang, Z. Tang, Z. Wen and C. Chen, *J. Mater. Chem. A*, 2017, **5**, 19017-19024.
- (4) L. Xue, Y. Li, H. Gao, W. Zhou, X. Lü, W. Kaveevivitchai, A. Manthiram and J. B. Goodenough, *J. Am. Chem. Soc.*, 2017, **139**, 2164-2167.
- (5) W. Zhang, W. K. Pang, V. Sencadas and Z. Guo, *Joule*, 2018, **2**, 1534-1547.
- (6) H. Wang, D. Yu, X. Wang, Z. Niu, M. Chen, L. Cheng, W. Zhou and L. Guo, *Angew. Chem. Int. Ed.*, 2019, **58**, 16451-16455.
- (7) T. Hosaka, S. Muratsubaki, K. Kubota, H. Onuma and S. Komaba, *J. Phys. Chem. Lett.*, 2019, **10**, 3296-3300.
- (8) Y. Lei, L. Qin, R. Liu, K. C. Lau, Y. Wu, D. Zhai, B. Li and F. Kang, *ACS Appl. Energy Mater.*, 2018, **1**, 1828-1833.
- (9) S. Liu, J. Mao, Q. Zhang, Z. Wang, W. K. Pang, L. Zhang, A. Du, V. Sencadas, W. Zhang and Z. Guo, *Angew. Chem. Int. Ed.*, 2020, **59**, 3638-3644.
- (10) L. Qin, Y. Lei, H. Wang, J. Dong, Y. Wu, D. Zhai, F. Kang, Y. Tao and Q.-H. Yang, *Adv. Energy Mater.*, 2019, **9**, 1901427.
